# Supplementary material for: Developing flow photo-thiol–ene functionalizations of cinchona alkaloids with an autonomous self-optimizing flow reactor
Source: Royal Society of Chemistry journal article supplement (doi:10.1039/d1re00509j), 2022-01-01
Supplement: d1re00509j1.pdf [file d1re00509j1.pdf]

# Electronic Supplementary Information

## Developing Flow Photo-Thiol-Ene Functionalizations of Cinchona Alkaloids with an Autonomous Self-Optimizing Flow Reactor

Kouakou Eric Konan,<sup>a,b</sup> Elvina Barré,<sup>a</sup> Ehu Camille Aka,<sup>a,b</sup> Abollé Dieurègne Abollé,<sup>b</sup>  
Vincent Coeffard,<sup>a</sup> and François-Xavier Felpin<sup>a,\*</sup>

<sup>a</sup> Université de Nantes, CNRS, CEISAM UMR 6230, 2 rue de la Houssinière, 44322 Nantes, France.

<sup>b</sup> Université Nangui Abrogoua, Laboratoire de Thermodynamique et de Physico-Chimie du Milieu, 02 BP 801 Abidjan 02, Côte d'Ivoire

\* Corresponding author. Tel.: +33-025-112-5422; e-mail: [fx.felpin@univ-nantes.fr](mailto:fx.felpin@univ-nantes.fr); ORCID: [0000-0002-8851-246X](https://orcid.org/0000-0002-8851-246X); Website: <http://felpin.univ-nantes.fr/>

### Table of content

|                                                           |               |
|-----------------------------------------------------------|---------------|
| <b>1. General information</b>                             | <b>S2</b>     |
| <b>2. Optimization algorithm</b>                          | <b>S2</b>     |
| <b>3. Details of the experimental setup</b>               | <b>S2</b>     |
| <b>4. Optimization studies for the thiol-ene reaction</b> | <b>S3</b>     |
| <b>5. NMR Spectra</b>                                     | <b>S4-S25</b> |
| <b>6. References</b>                                      | <b>S26</b>    |

## 1. General information

All reagents, starting materials and solvents were obtained from commercial suppliers and used as such without further purification, unless otherwise noted. High-field  $^1\text{H}$  and  $^{13}\text{C}$  NMR spectra were recorded at 300 or 400 and 75 or 100 MHz, respectively.  $^1\text{H}$  and  $^{13}\text{C}$  NMR spectra were referenced to the internal deuterated solvent ( $\text{CDCl}_3$ ) at 7.26 and 77.16 ppm, respectively and Coupling constants were measured in Hertz. All chemical shifts were quoted in ppm, relative to TMS, using the residual solvent peak as a reference standard. The following abbreviations were used to explain the multiplicities: s = singlet, d = doublet, t = triplet, q = quartet, m = multiplet, br = broad. FT-IR spectra were recorded in the ATR mode. Wavelengths of maximum absorbance ( $\nu_{\text{max}}$ ) are shown in wave numbers ( $\text{cm}^{-1}$ ). High resolution mass spectrometry (HRMS) was recorded on a microTOF spectrometer equipped with orthogonal electrospray interface (ESI). Reactions were monitored by thin layer chromatography (TLC) with 0.25 mm pre-coated silica gel plates (60 F254), and visualization was accomplished with UV light at 254 nm. Flash column chromatography was performed using silica gel 60 (40–63  $\mu\text{m}$ ).

## 2. Optimization algorithm

The optimization algorithm here used has been described in our previous reports.<sup>1,2</sup>

**3. Details of the experimental setup.** HPLC pumps (JASCO PU2080) equipped with a RS-232 port were employed to flow the solution through the system. A sampler handler (JASCO AS 2055) equipped with a RS-232 port was used to inject reagent in the line. The reactor coil was heated with a heating plate (Heidolph, MR Hei-Connect) equipped with a RS-232 port. A 2-way 6-port valve (VICI, Cheminert C2-3006D) equipped with a RS-232 port was used to inject an aliquot of the crude mixture within the on-line HPLC unit. The HPLC column outlet was connected to a UV detector (JASCO, UV 2075) equipped with a RS-232 port. The flow outlet was connected to a programmable fraction collector (Advantec, CHF 1225C). All units equipped with a RS-232 port were autonomously controlled with MATLAB<sup>®</sup> through the use of communication protocols provided by the manufacturers.

#### 4. Optimization studies thiol-ene reaction

**Table S1.** Maximization of the yield of quinine derivative **3a**

| Experiment | DMPA<br>(equiv.) | Thiol<br>(equiv.) | Residence time<br>(min) | Yield<br>(%) |
|------------|------------------|-------------------|-------------------------|--------------|
| 1          | 1.0              | 1.0               | 10.0                    | 13           |
| 2          | 1.3              | 1.0               | 10.0                    | 19           |
| 3          | 1.0              | 2.0               | 10.0                    | 32           |
| 4          | 1.0              | 1.0               | 20.0                    | 68           |
| 5          | 1.2              | 1.7               | 16.7                    | 81           |
| 6          | 1.3              | 2.0               | 20.0                    | 94           |
| 7          | 0.9              | 2.3               | 23.3                    | 94           |
| 8          | 1.1              | 1.6               | 32.2                    | 91           |
| <b>9</b>   | <b>1.2</b>       | <b>2.9</b>        | <b>30.0</b>             | <b>99</b>    |

#### 5. NMR Spectra

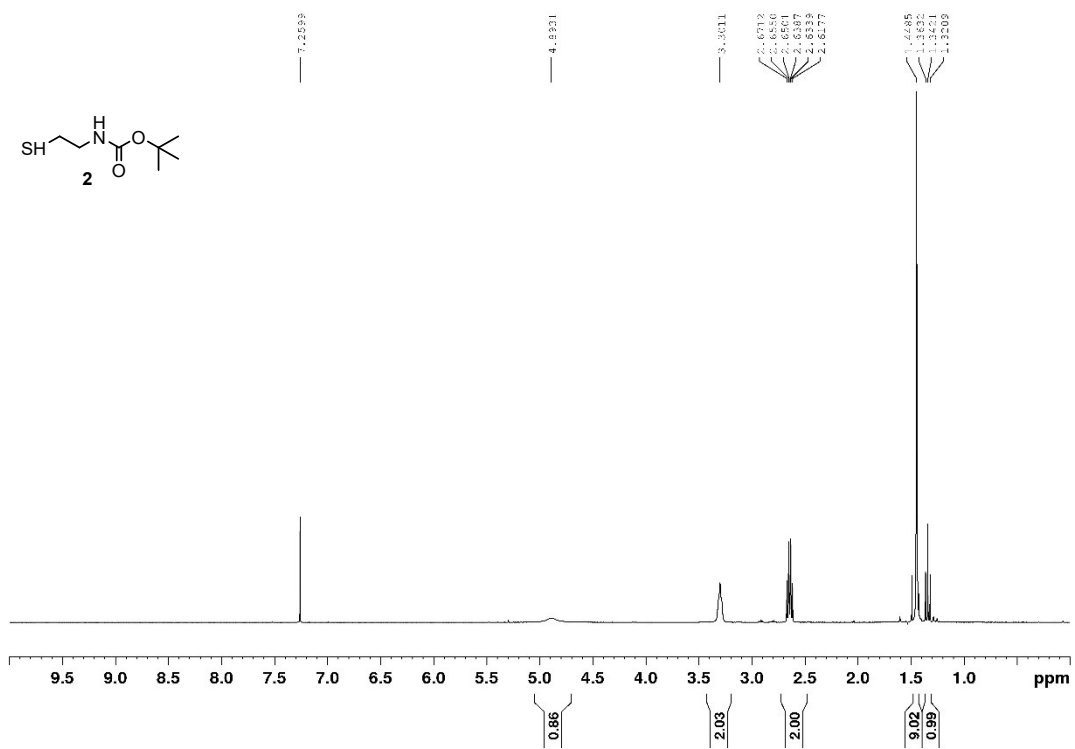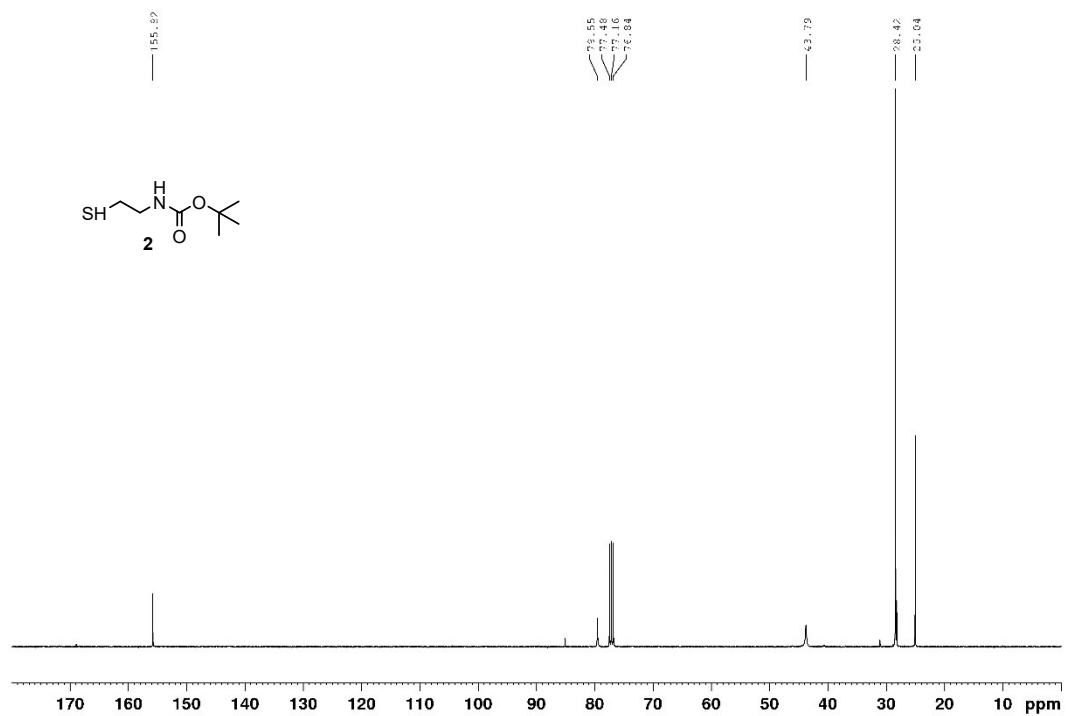



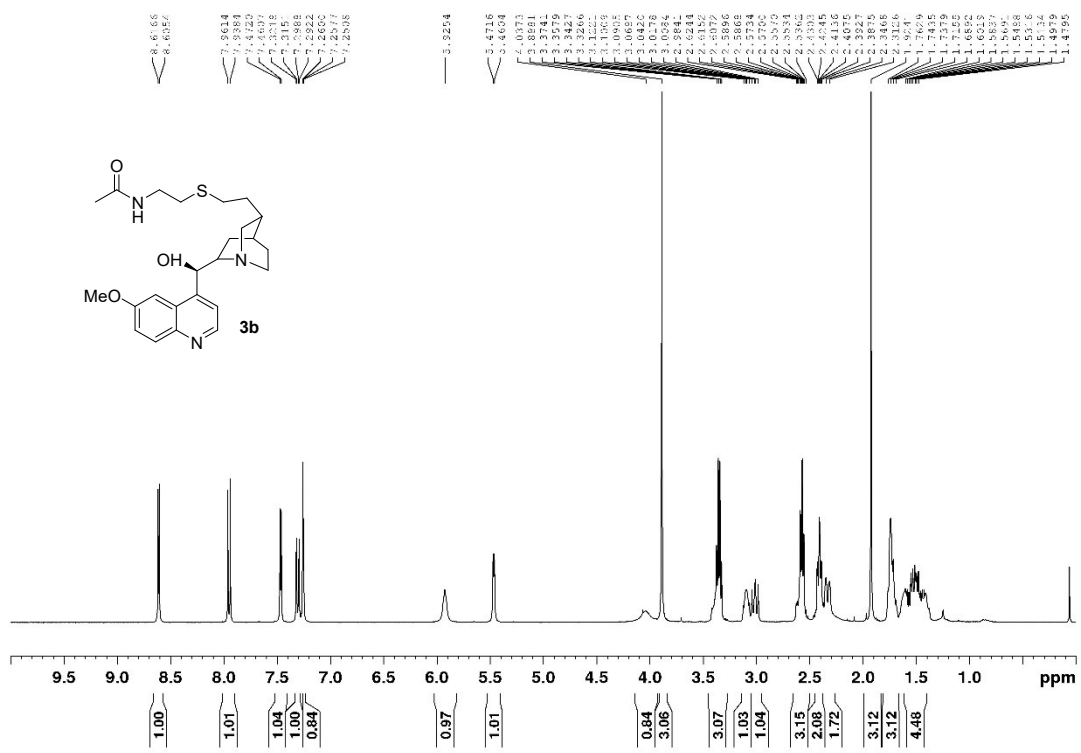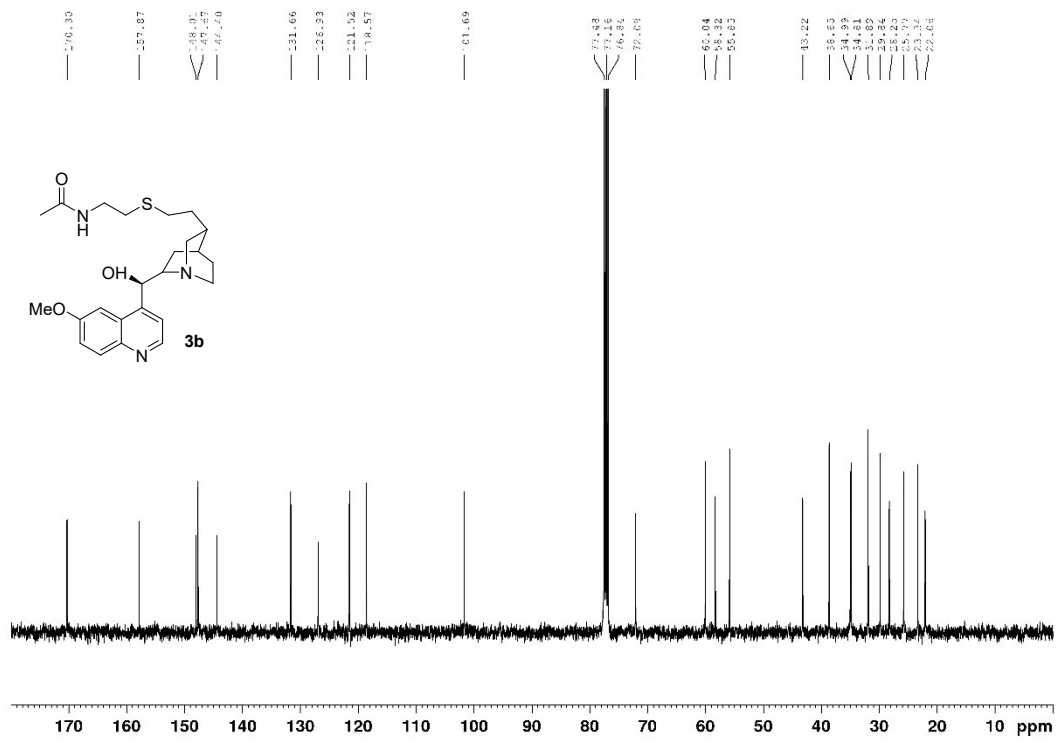

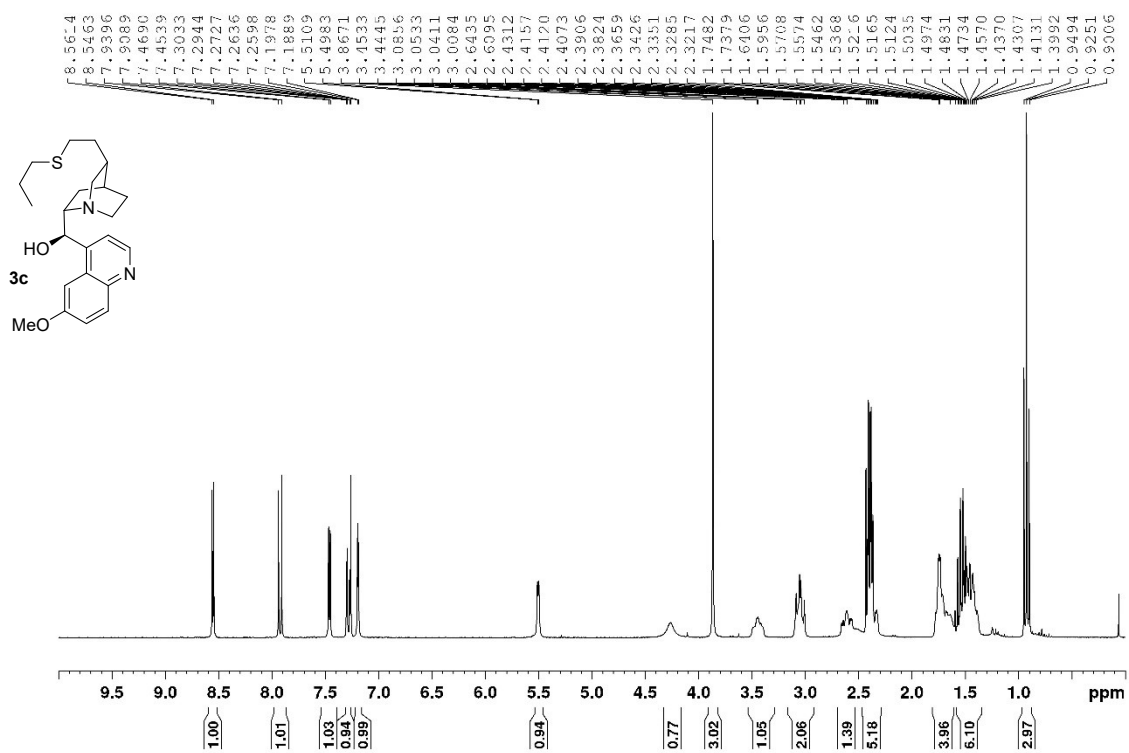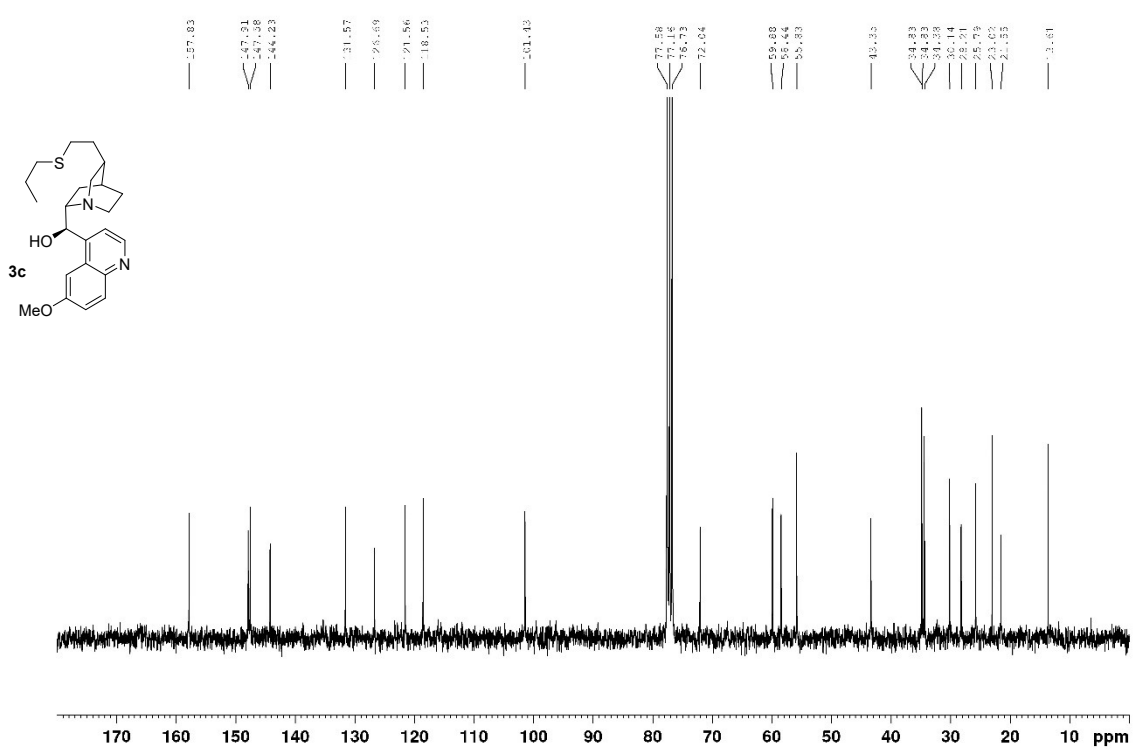

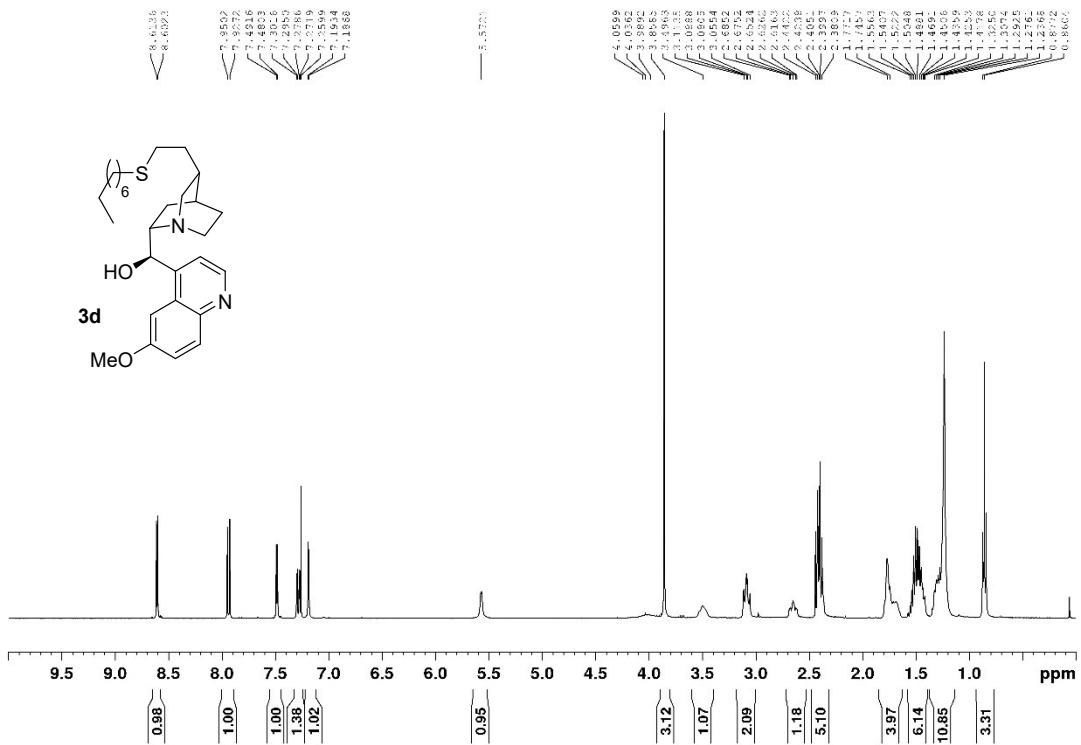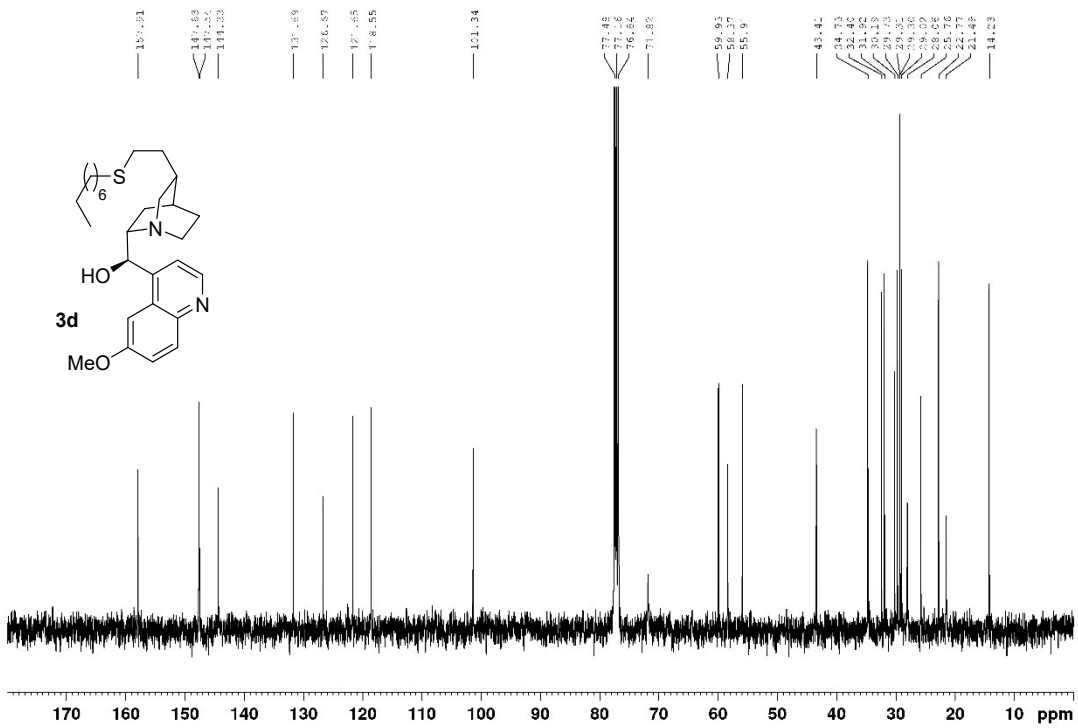





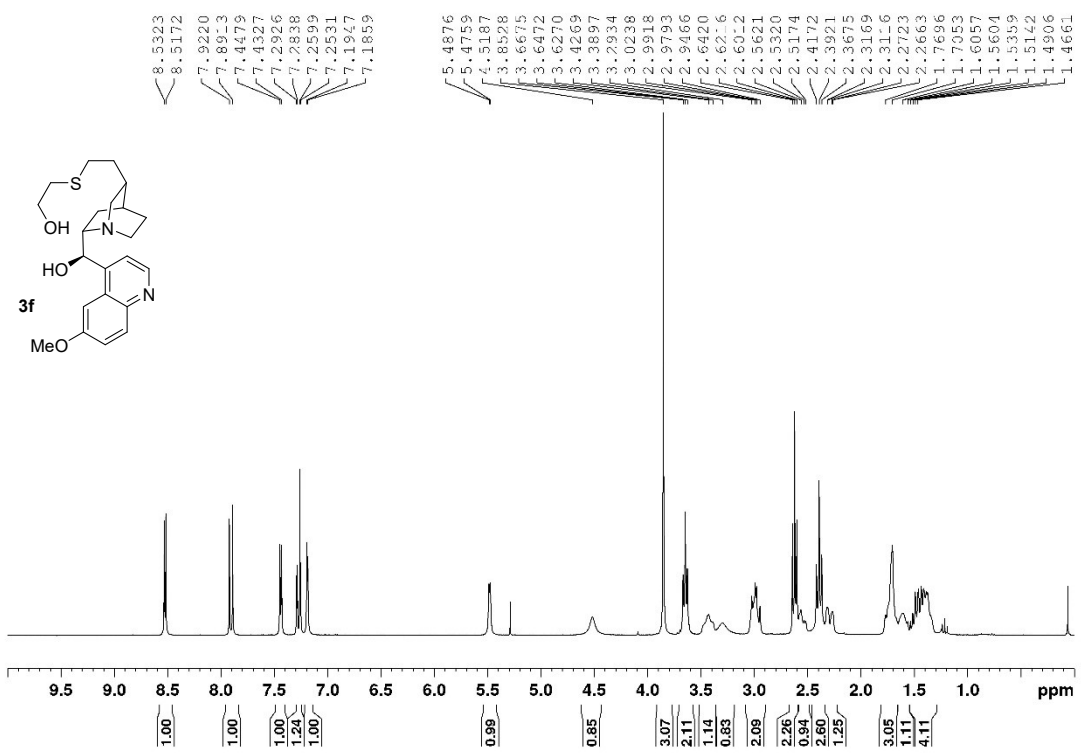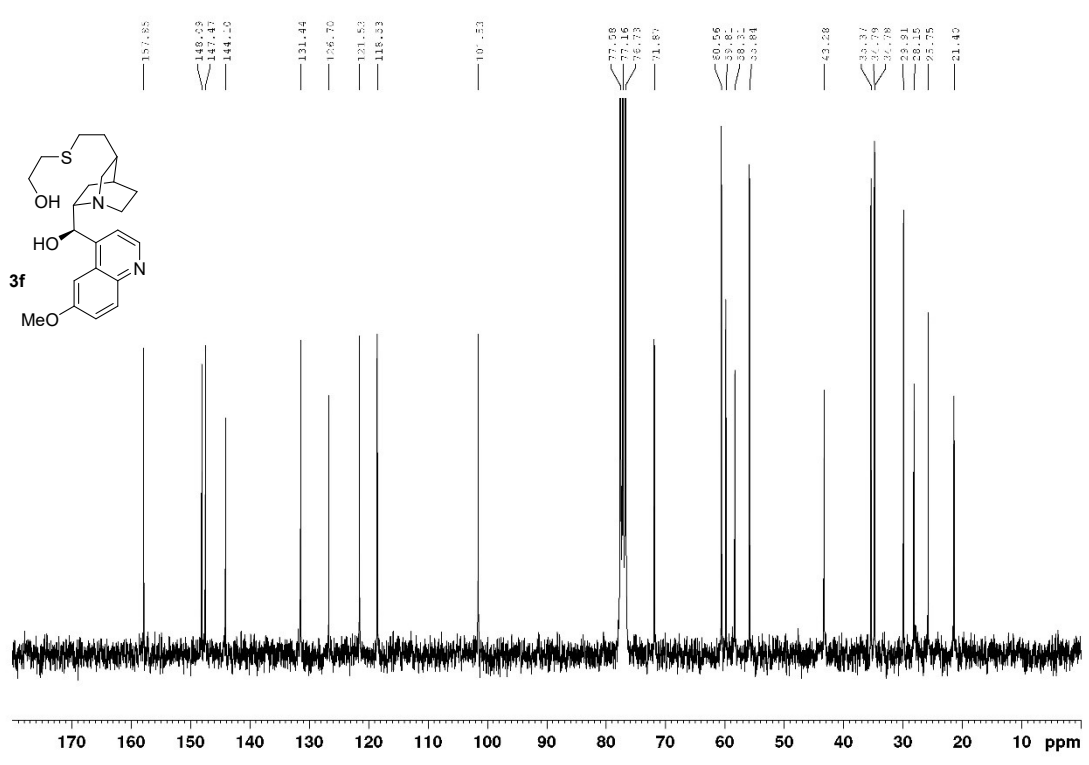

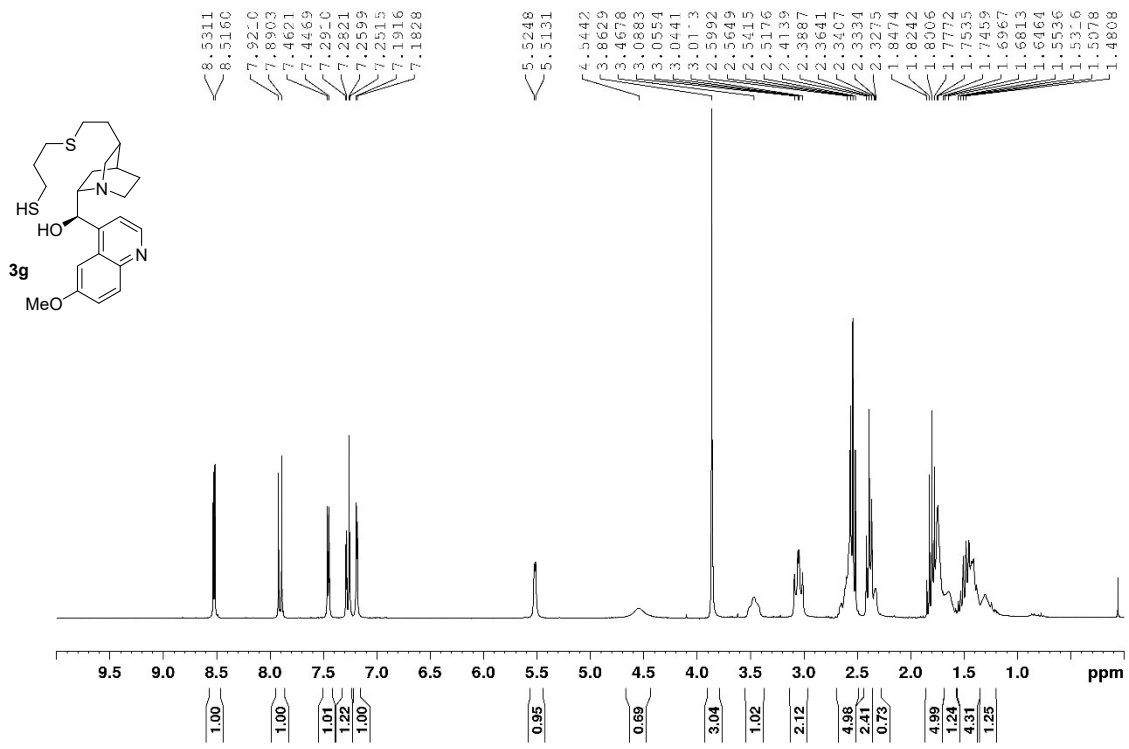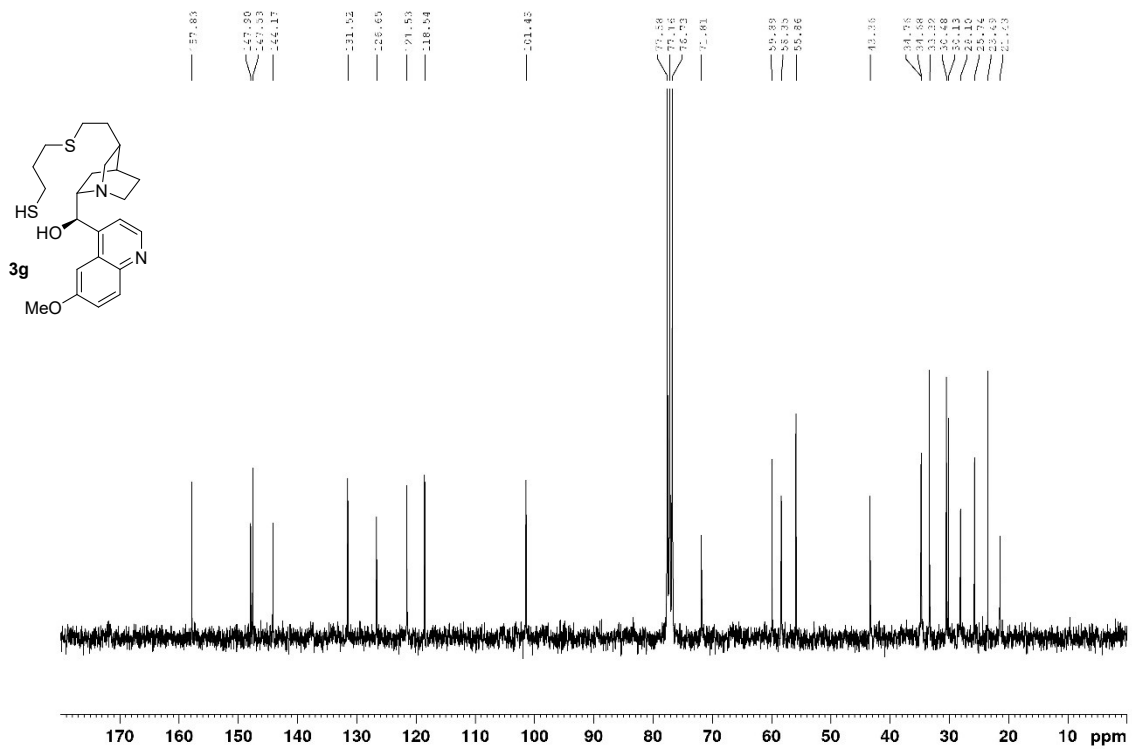

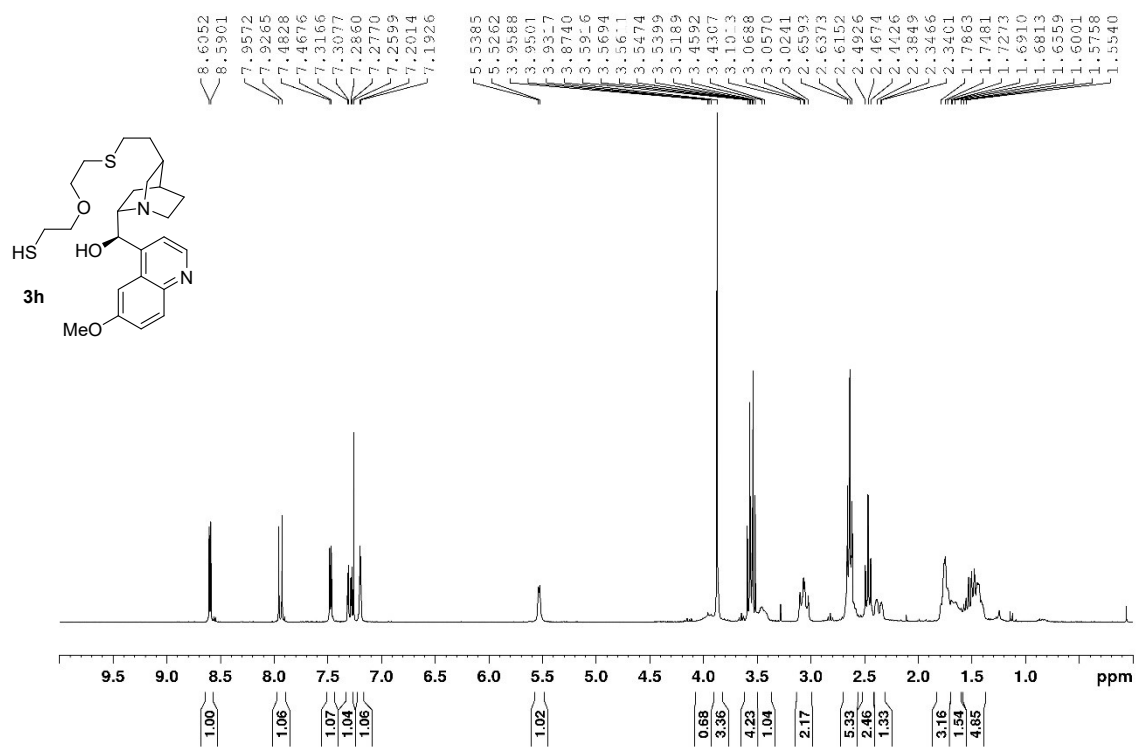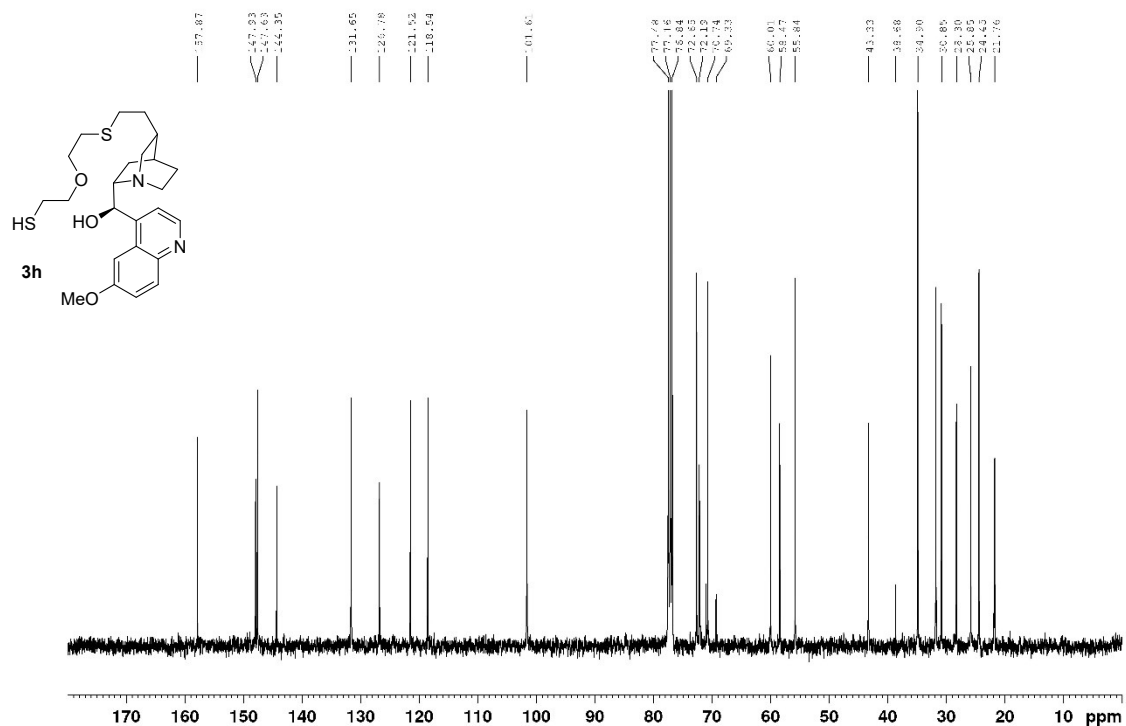

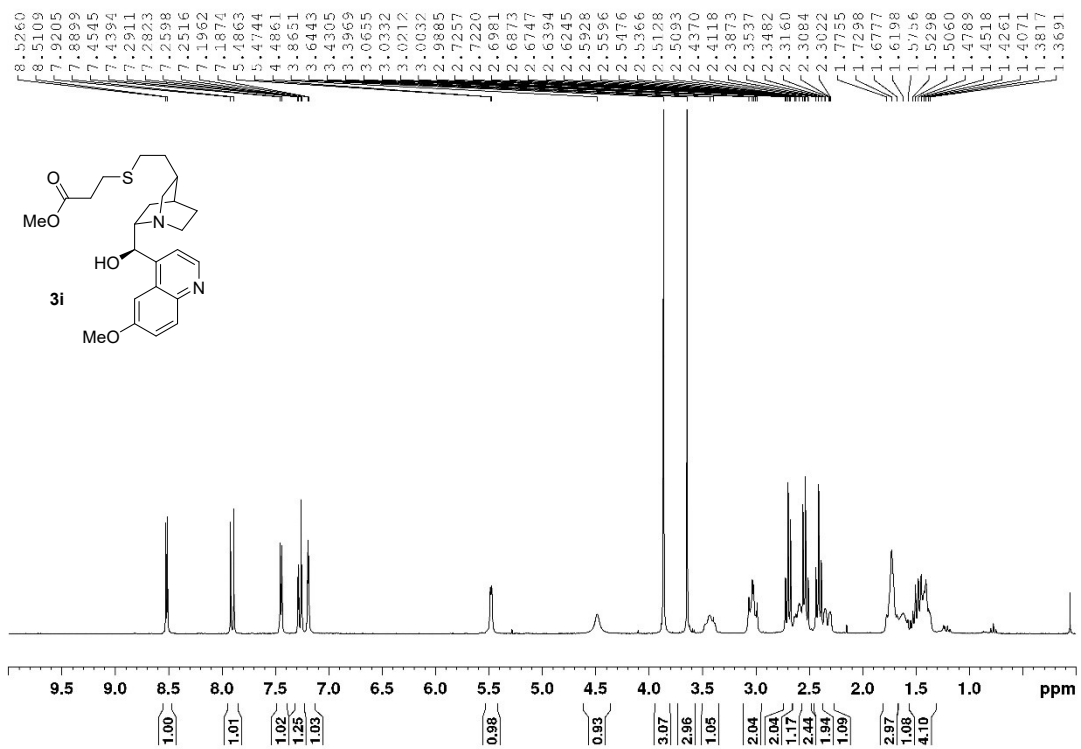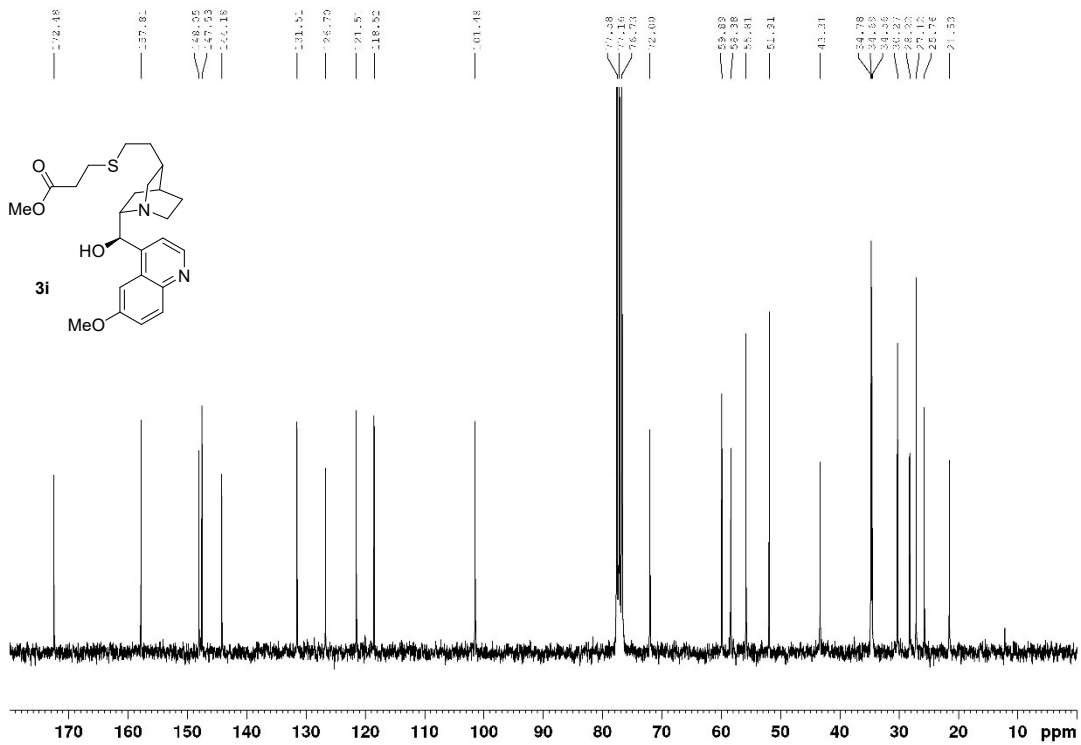

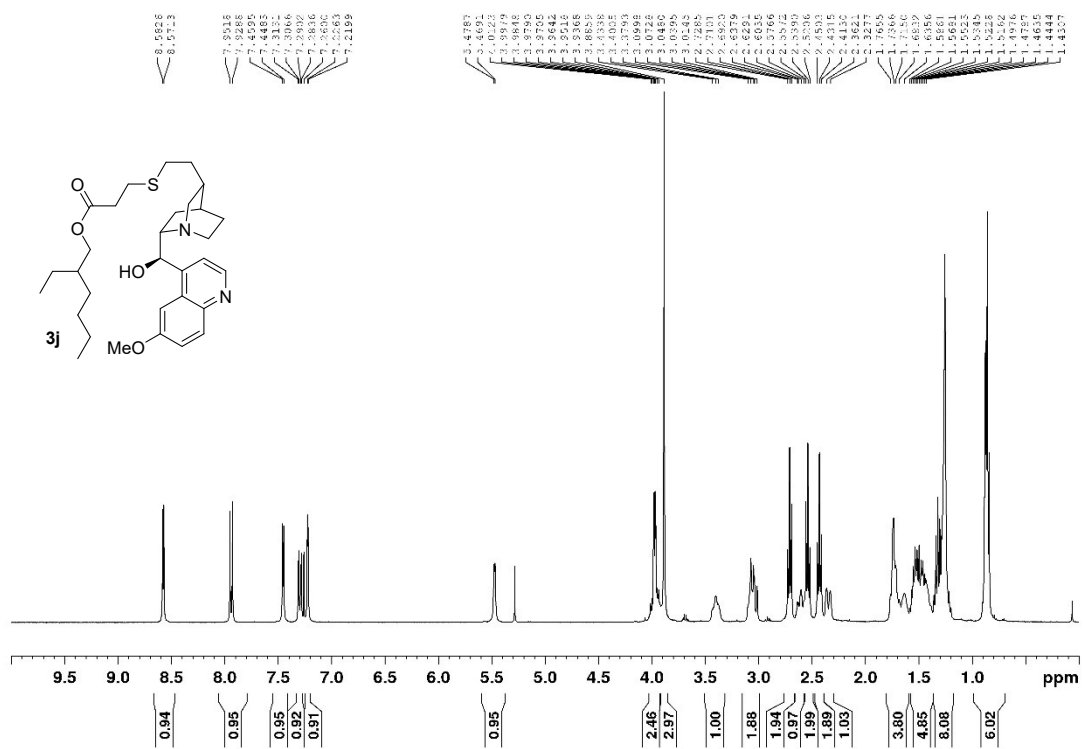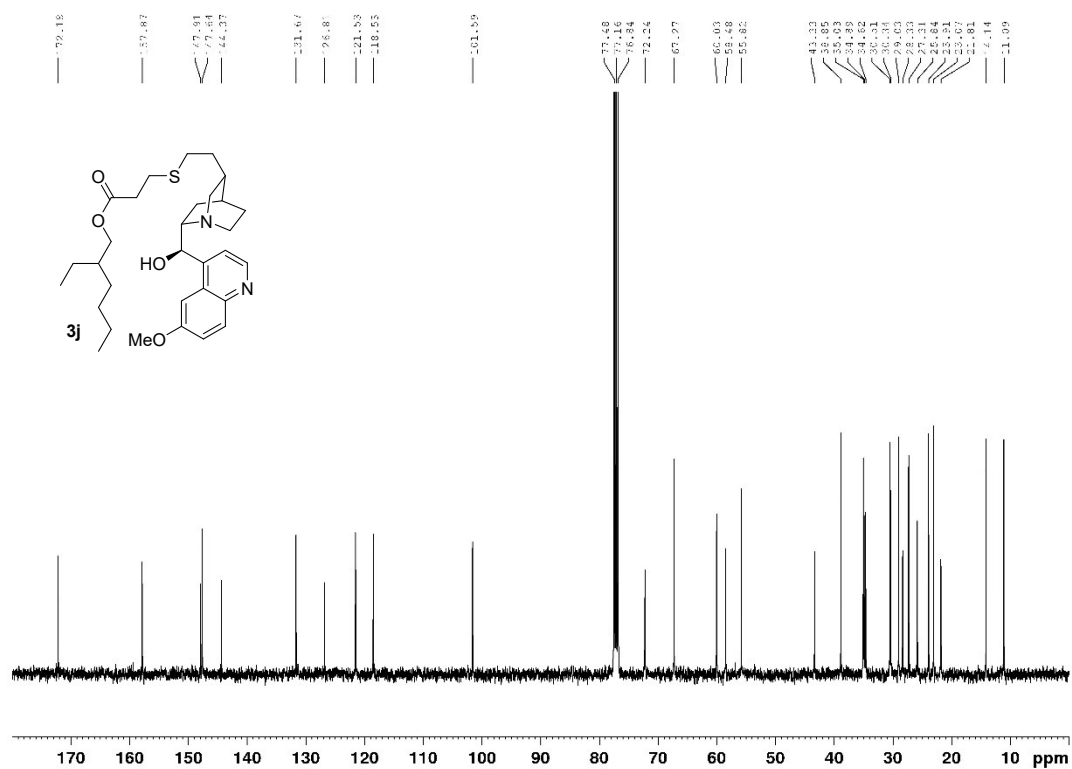







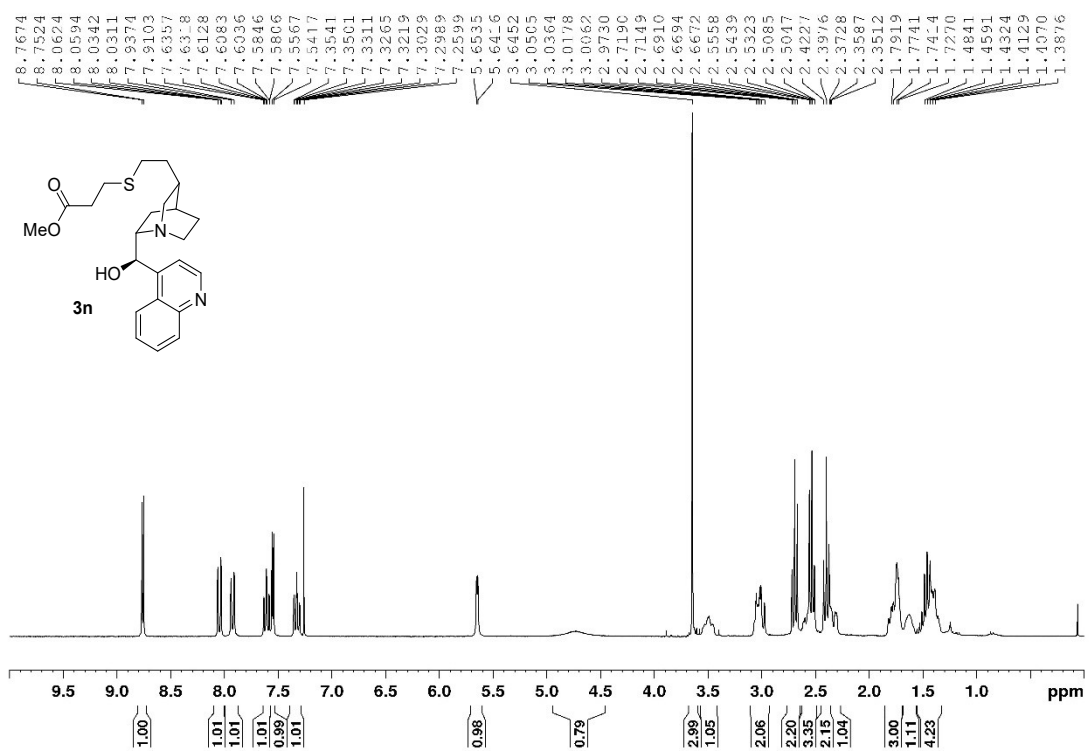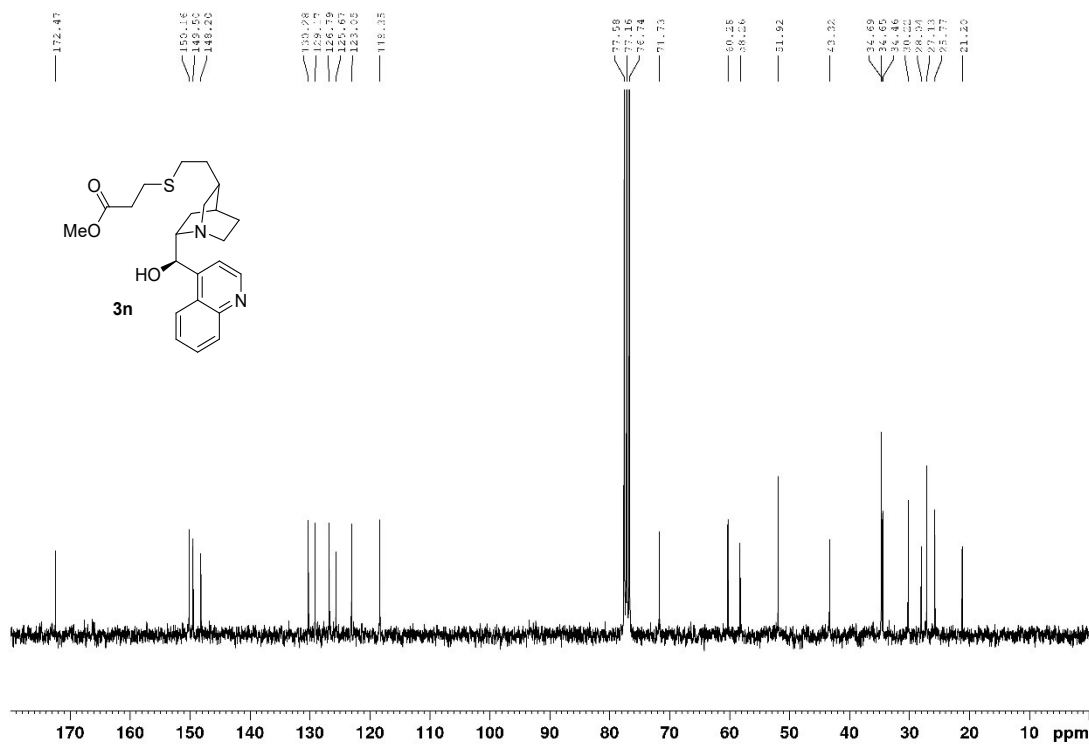

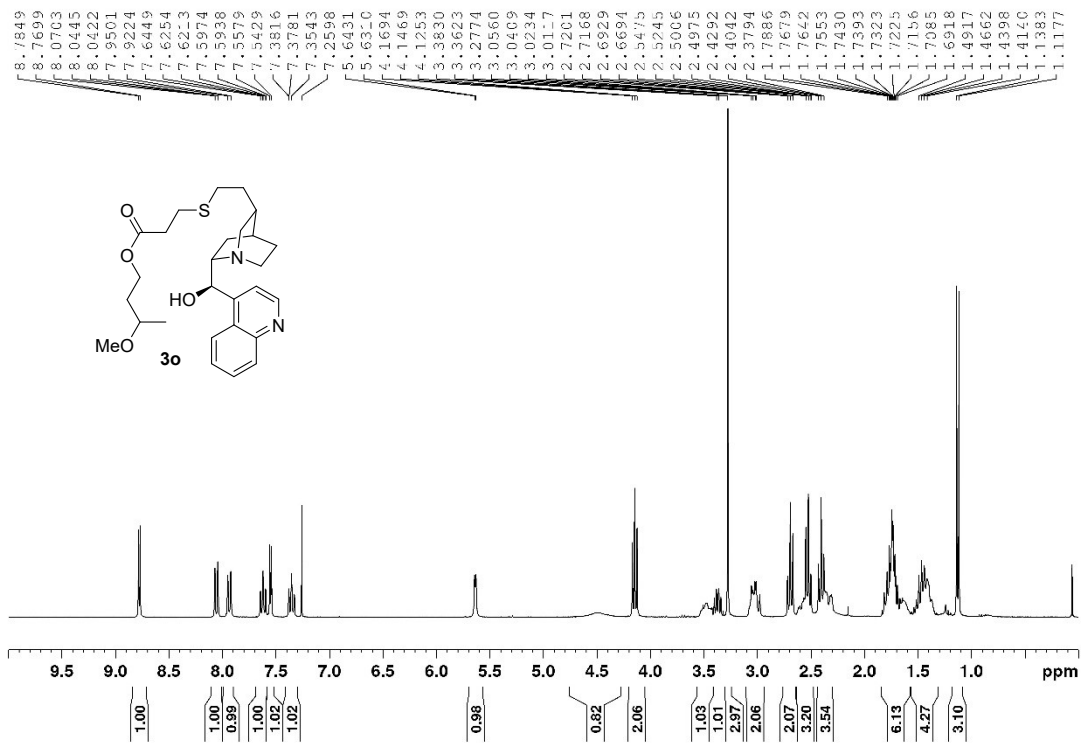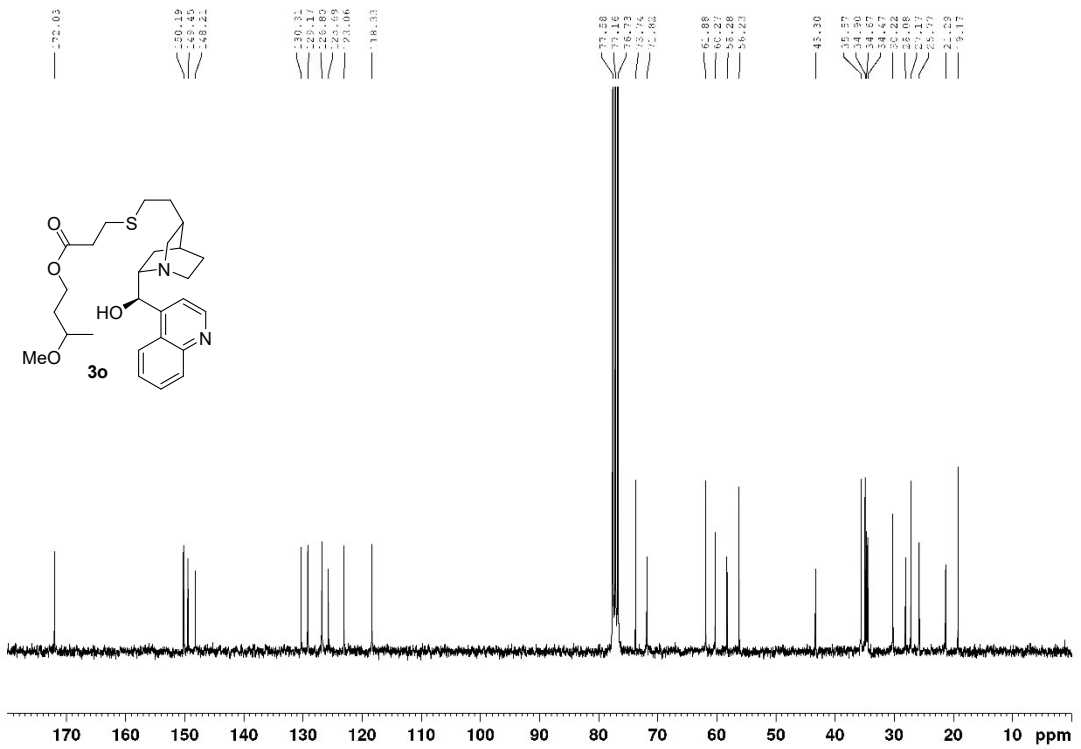

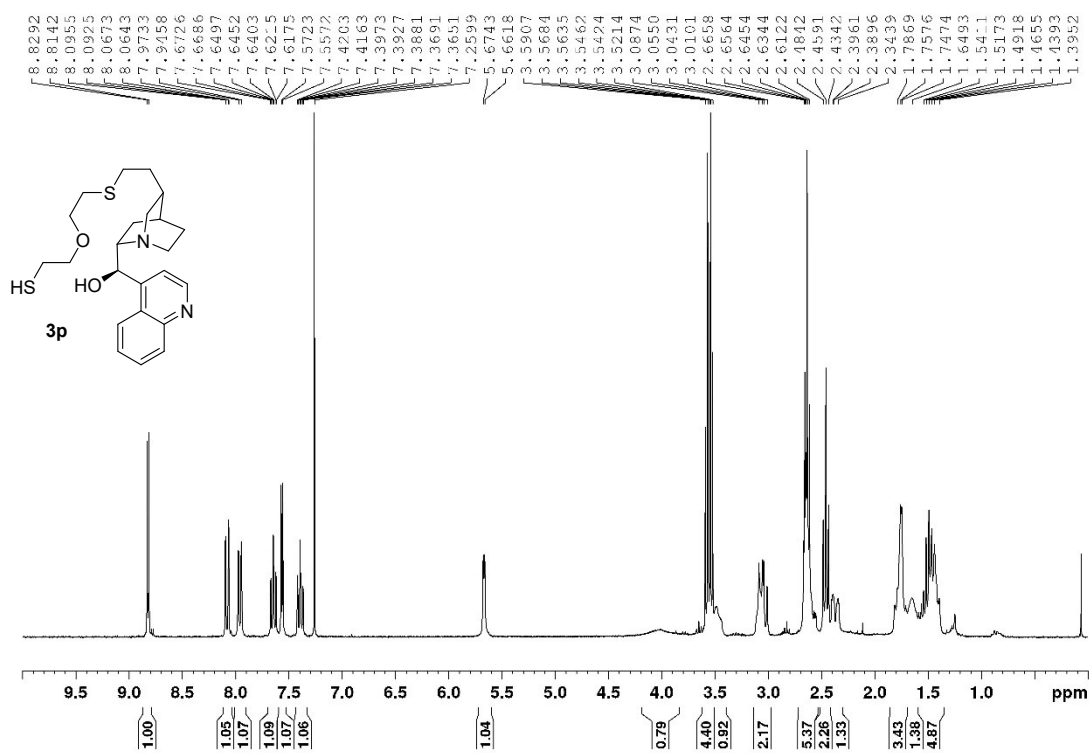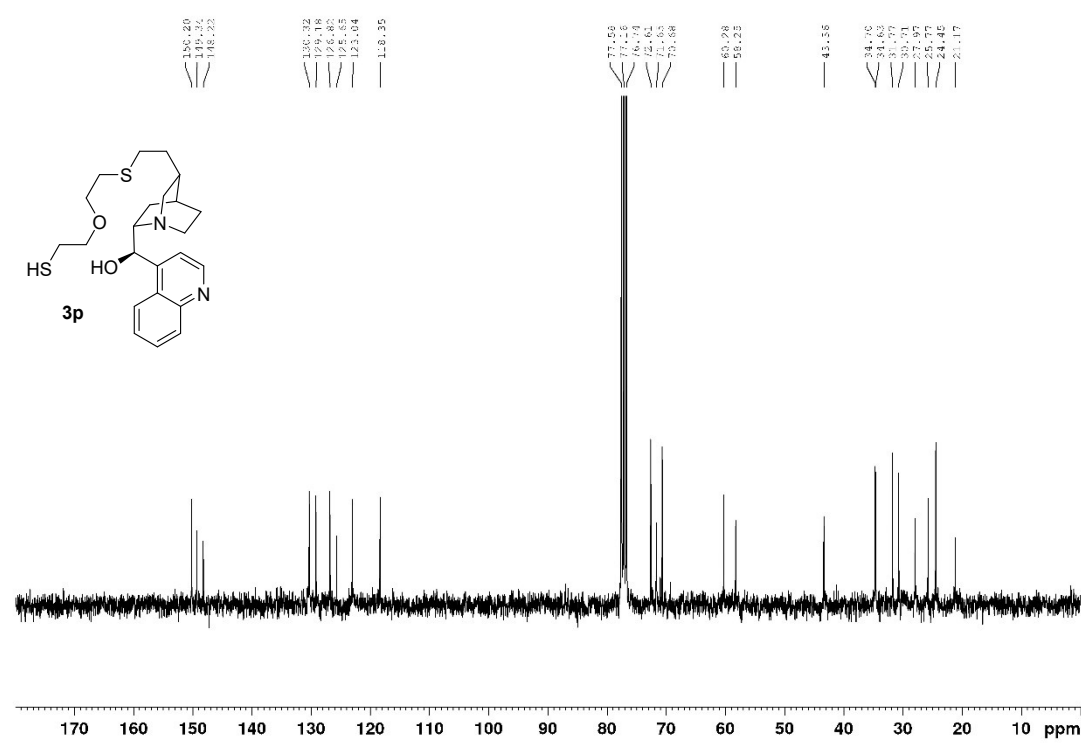

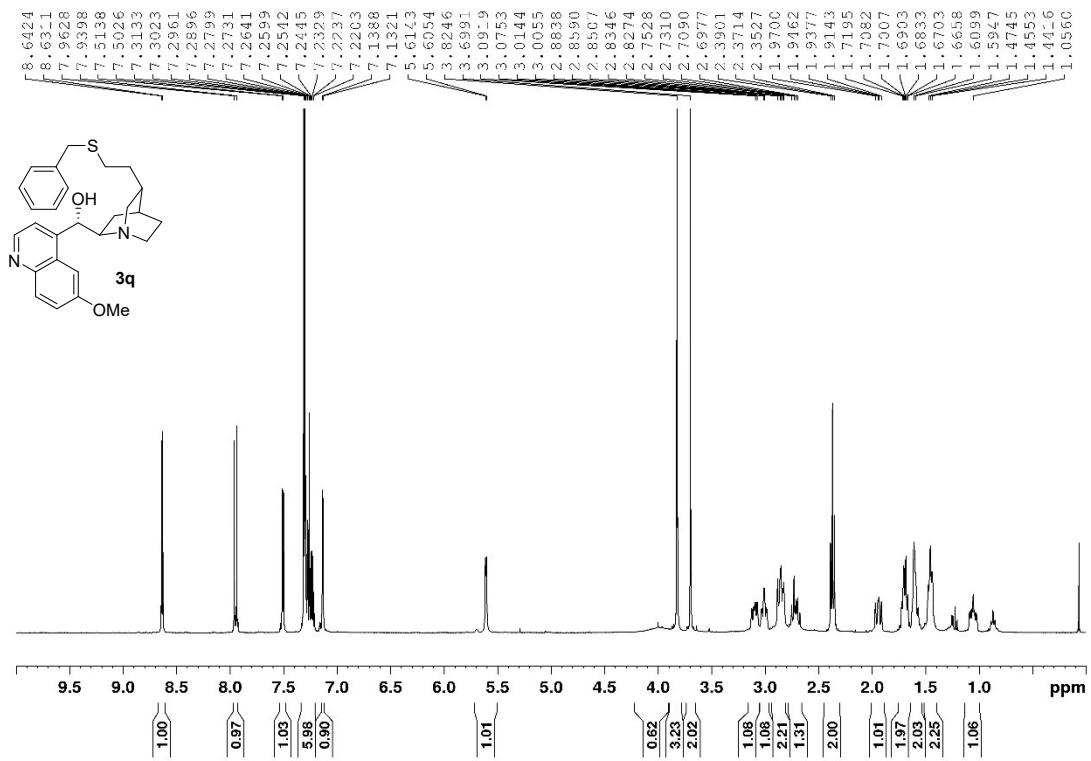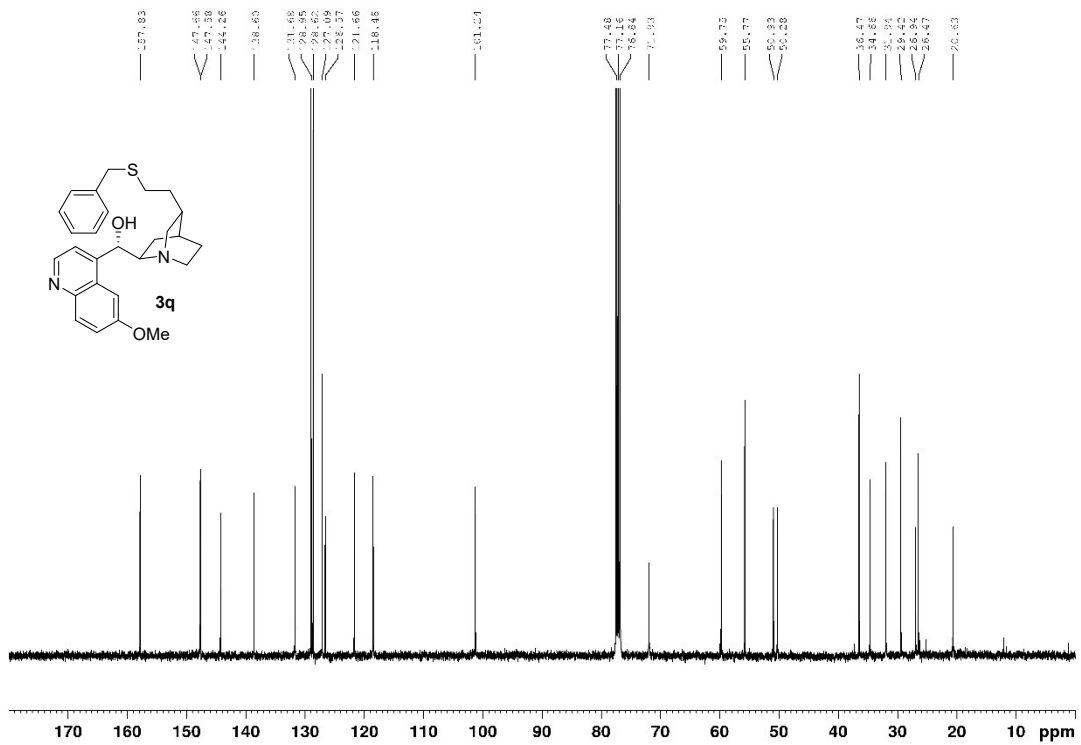

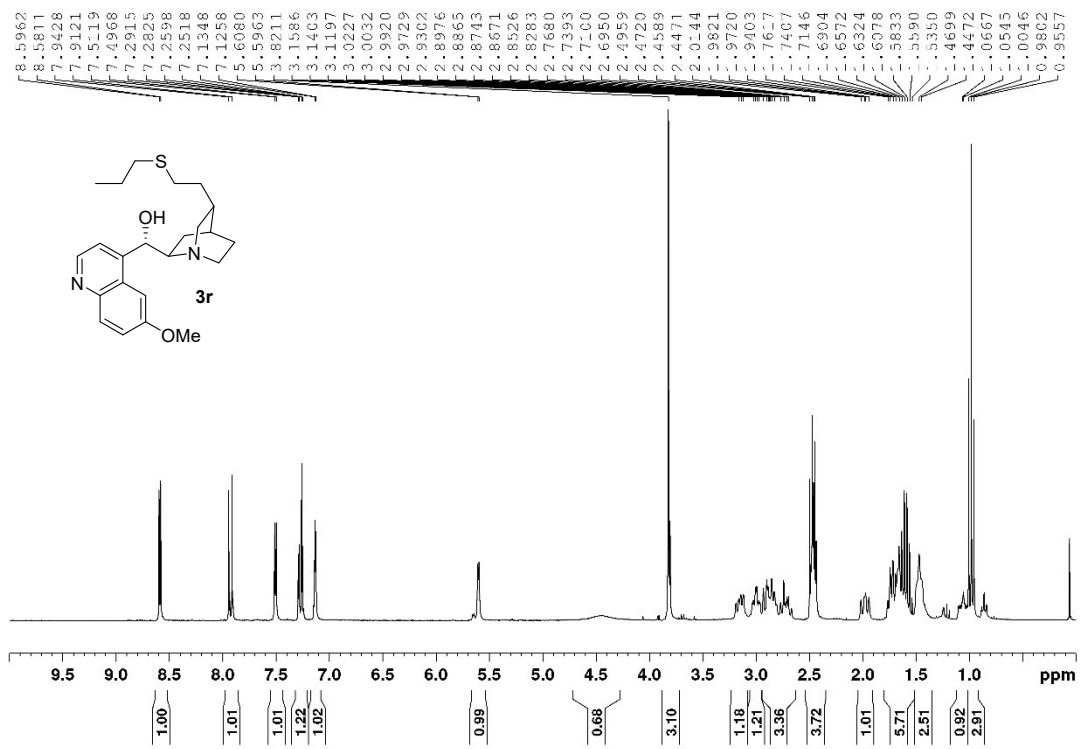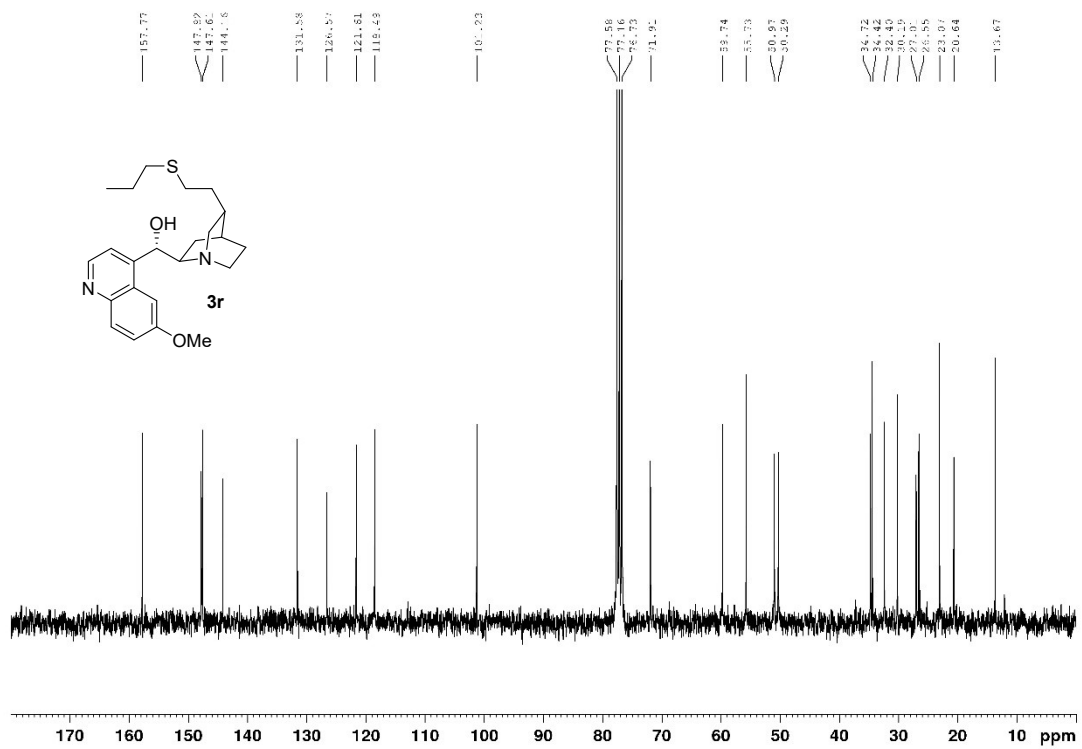

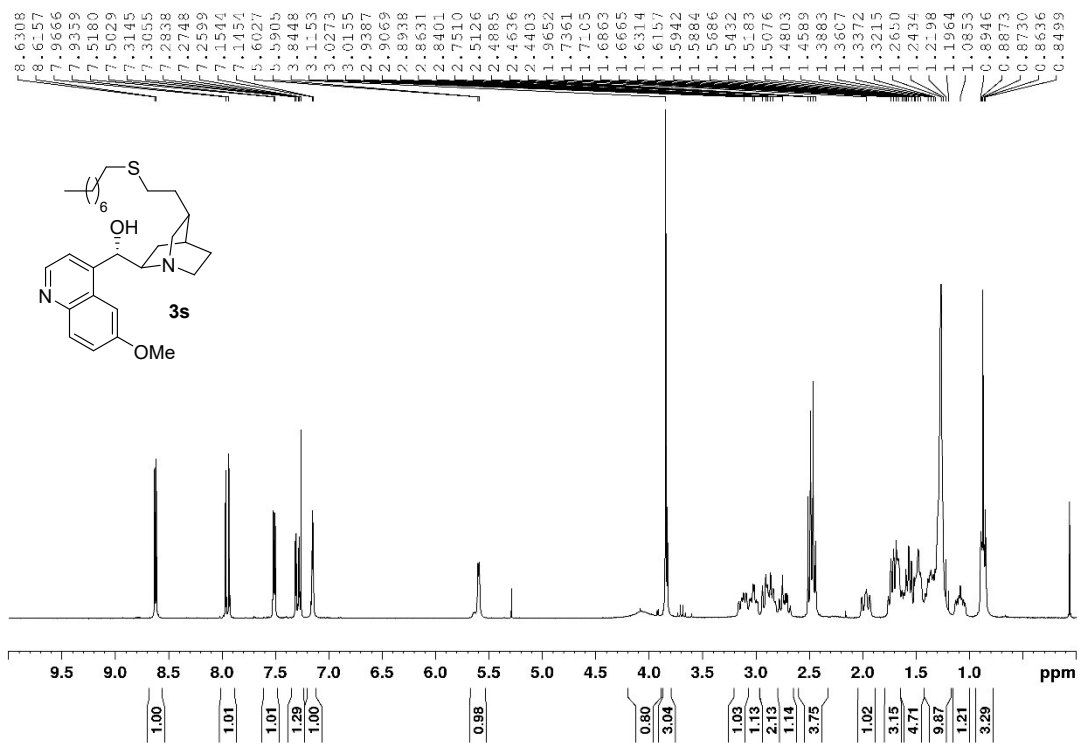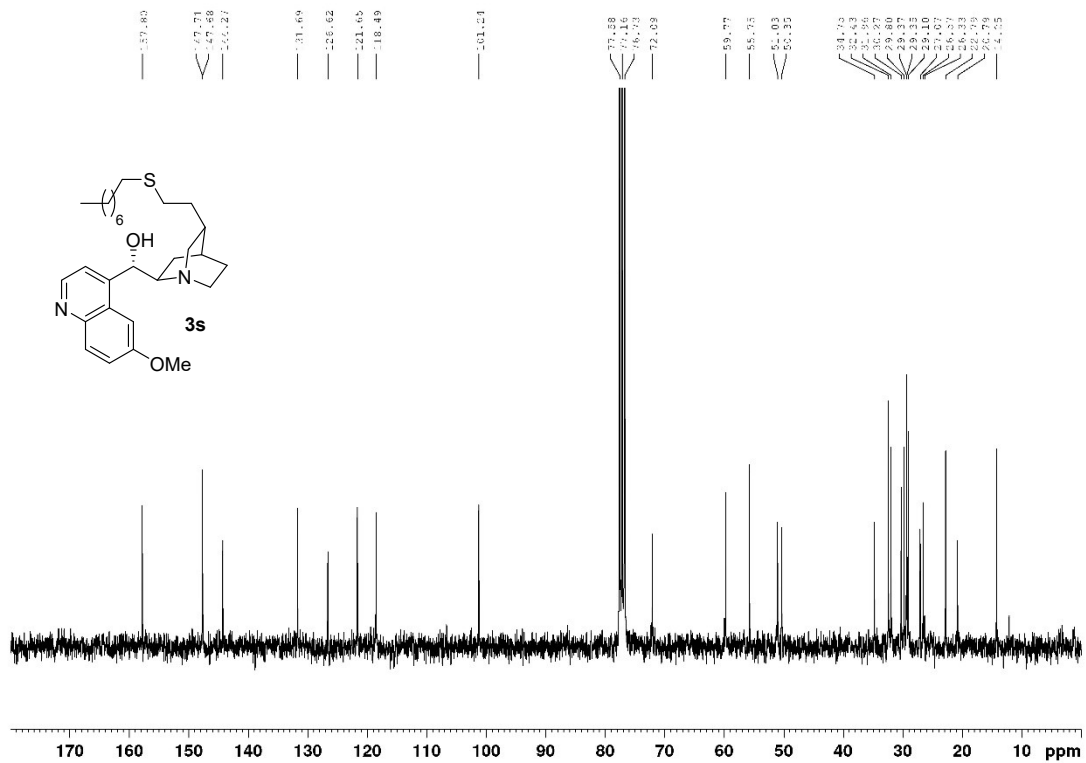

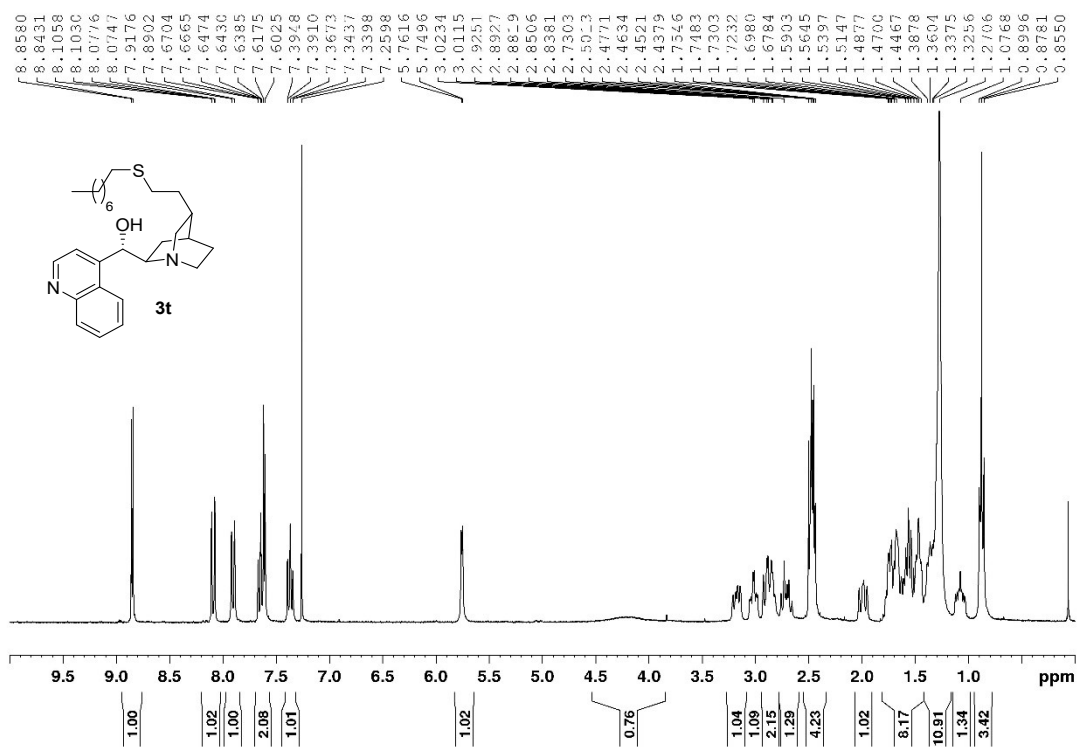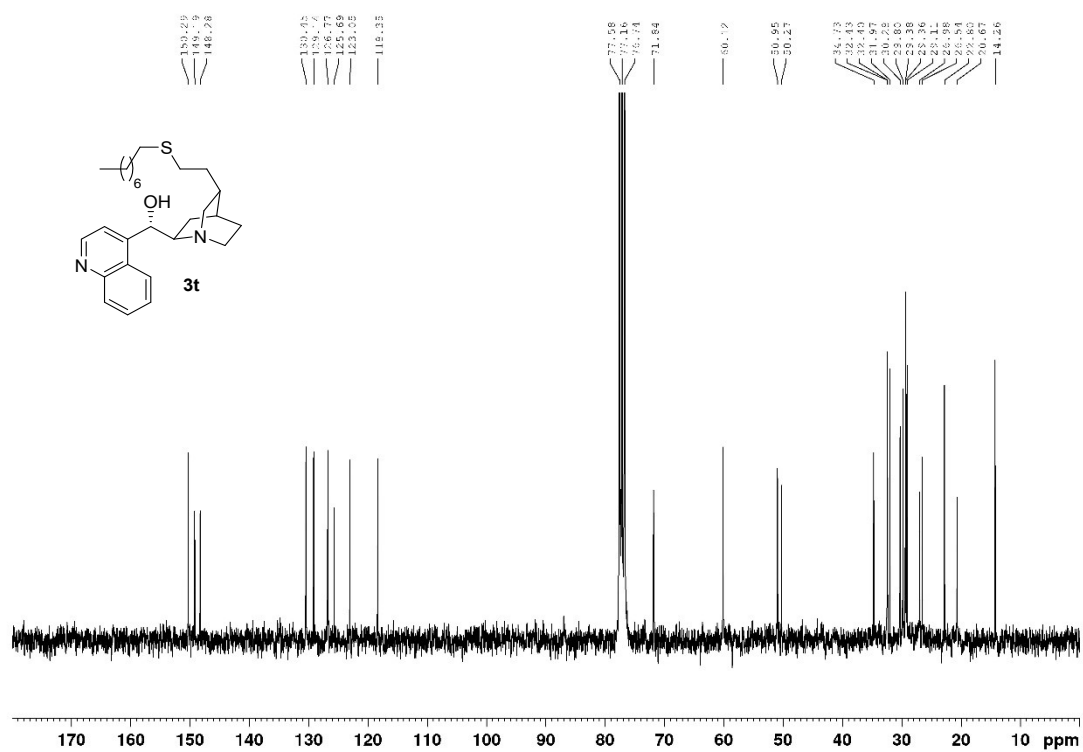

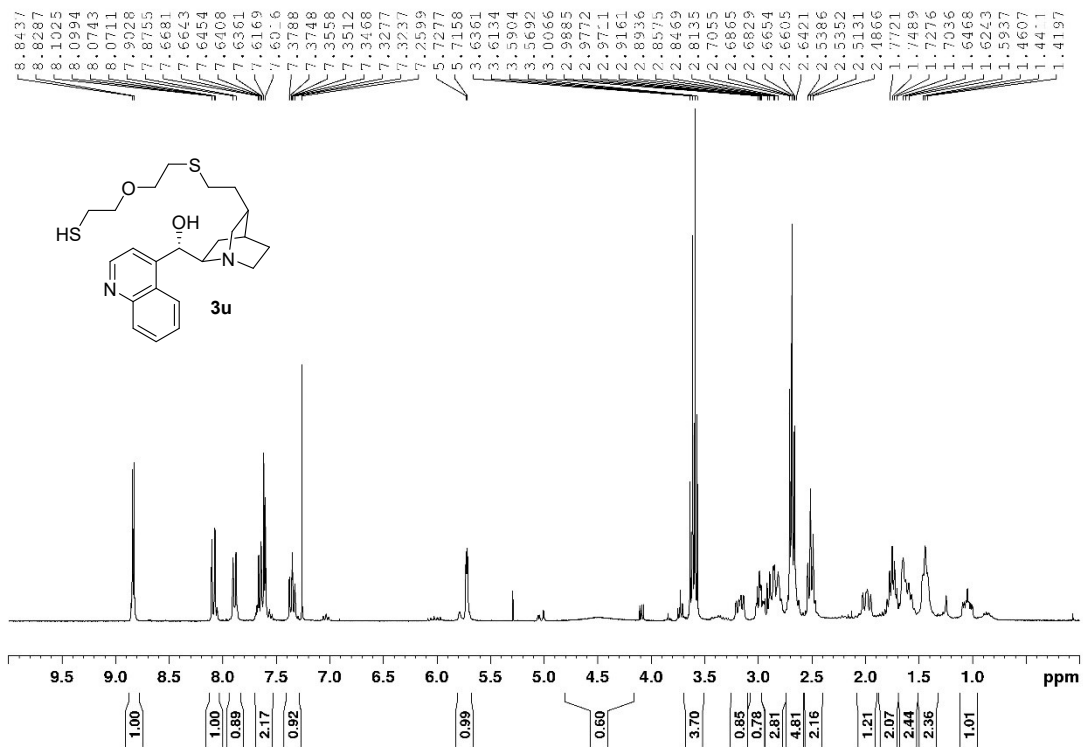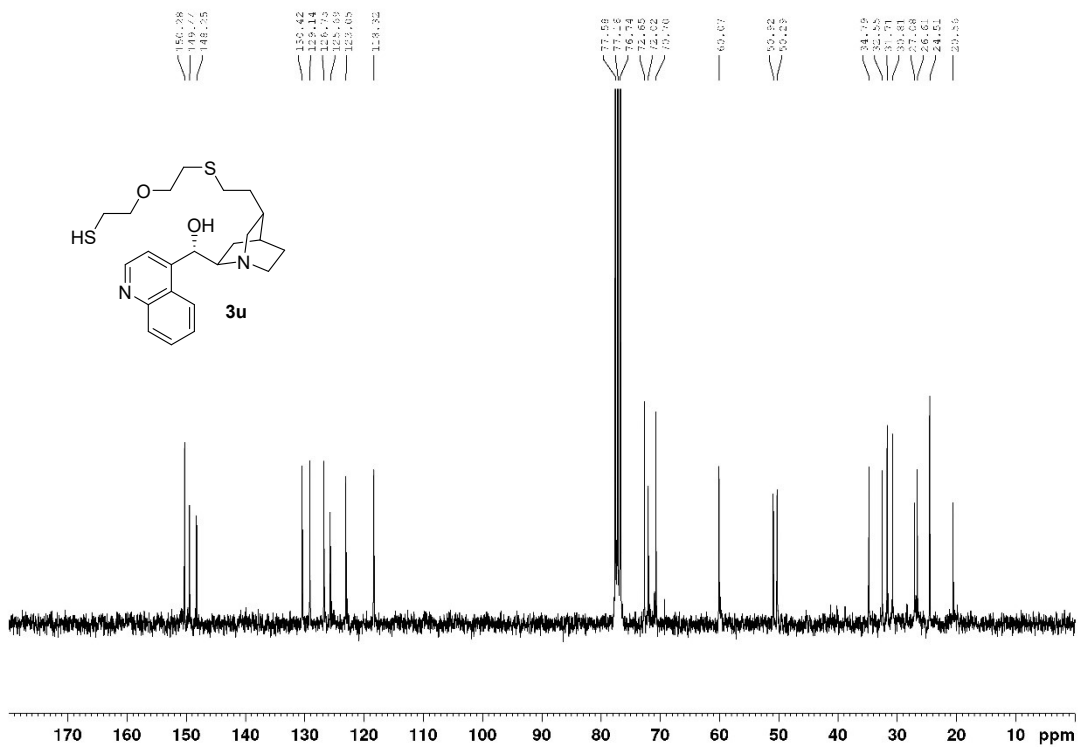



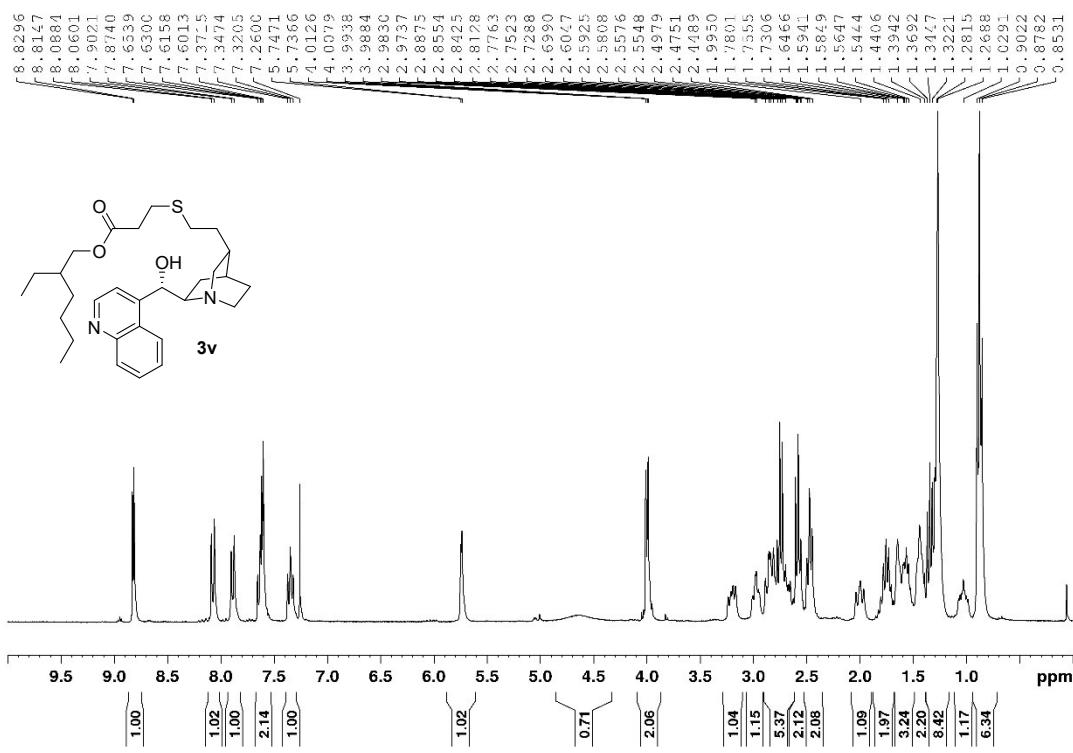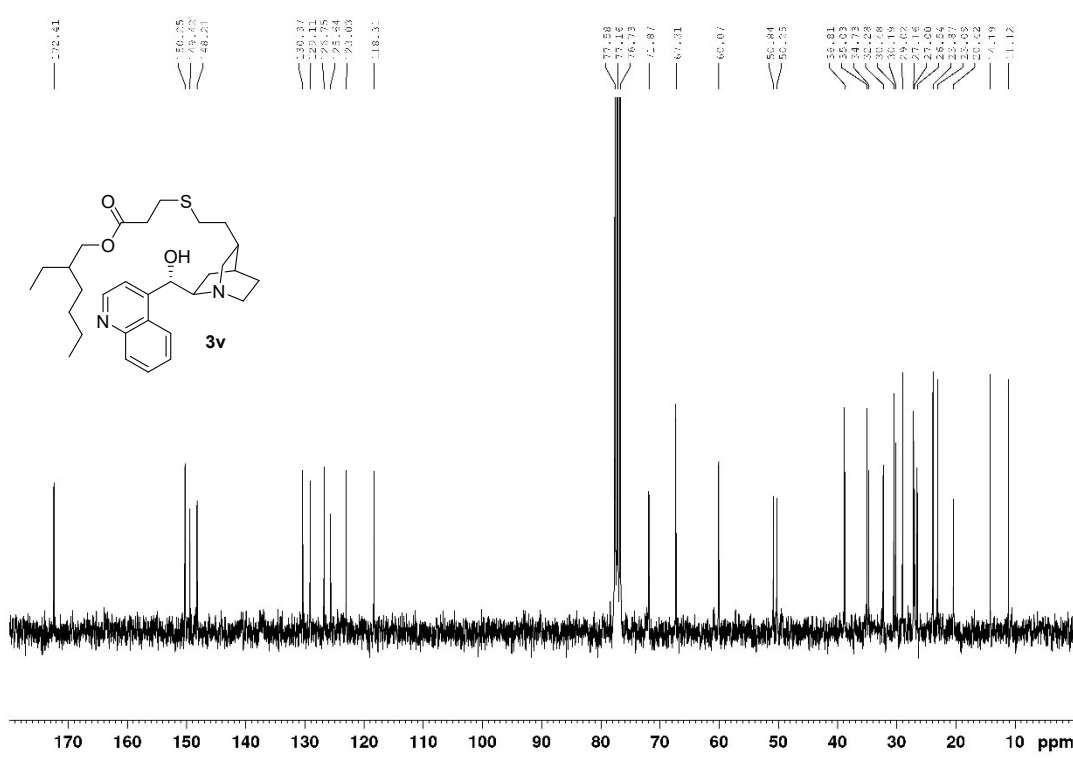

## 6. References

1. D. Cortés-Borda, K. V. Kutonova, C. Jamet, M. E. Trusova, F. Zammattio, C. Truchet, M. Rodriguez-Zubiri and F.-X. Felpin, *Org. Process Res. Dev.*, 2016, **20**, 1979-1987.
2. D. Cortés-Borda, E. Wimmer, B. Gouilleux, E. Barré, N. Oger, L. Goulamaly, L. Peault, B. Charrier, C. Truchet, P. Giraudeau, M. Rodriguez-Zubiri, E. Le Grogneec and F.-X. Felpin, *J. Org. Chem.*, 2018, **83**, 14286-14299.
